# Supplementary material for: Immune landscape of a genetically engineered murine model of glioma compared with human glioma
Source: JCI journal article supplement (doi:10.1172/jci.insight.148990), 2022-06-06
Supplement: sd1 [file 1]

You are being redirected.
